# Supplementary material for: Evaluation of a biosecurity survey approach for contamination by Chlamydia pecorum in koala rehabilitation, field capture, and captive settings
Source: PeerJ. 2023 Aug 15;11:e15842. doi: 10.7717/peerj.15842 (PMC10437030; doi:10.7717/peerj.15842)
Supplement: Supplemental Information 1 [file peerj-11-15842-s001.xlsx]

## Sheet: Sheet1
		Chlamydial DNA qPCR Ct-value						Cell culture
		Actin		C. pecorum		Chlamydia genus 23S		UTM Swab
Substrate swabbed	qPCR run No.	1	2	1	2	1	2
Exam bench After clean	1	32.39	33.38	39.03	39.28	27.06	38.98	-
ICU 10 Ch+ koala Gunyah After clean	1	35.12	35.09	39.52	­	37.78	­	-
Volunteer #2 hands Before wash	5	35.42	37.78	39.66	­	37.96	38.15	-
Volunteer #3 hands Before wash	4	31.69	32.02	33.09	32.77	34.76	33.43	-
Volunteer #3 hands After wash	1	37.05	­	37.12	­	36.66	­	++
Stethoscope Ch+ koala After clean	1	38.18	39.24	37.14	­	37.01	­	-
Oxygen mask Ch+ koala After clean	1	31.52	31.43	37.91	­	36.13	­	+
Oxygen Mask before Ch+ koala	6	27.61	27.53	39.37	38.87	32.19	32.16	+
Oxygen Mask after Ch+ koala before clean	6	26.35	26.75	38.49	39.47	30.82	31.9	++
Oxygen Mask after Ch+ koala after clean	1	27.73	27.09	28.91	29.1	30.17	30.18	-
oxygen mask after Ch+ koala before clean	6	26.66	26.61	39.27	39.03	31.46	31.65	-
oxygen mask after clean from Ch+ koala 118	1	31.23	31.21	32.52	37.08	33.53	33.96	Not found
Capture bag before Regular wash from Ch+ koala	6	31.1	31.18	39.62		34.22	35.27	+++
ICU 5 Adjacent to Ch+ koala Wall 3 before clean	6	38.18	39.07	38.47	­	37.64	­	+++
ICU 6 Ch+ koala Wall 2 before clean	6	38.05	38.99	39.83	­	38.75	39.14	++
ICU 6 Ch+ koala Floor before clean	4	33.02	33.04	37.82	37.87	35.95	37.11	-
ICU 6 Ch+ koala PVC before clean	6	34.44	34.67	39.83	­	36.09	37.01	+++
oxygen mask after Ch+ koala Before clean	4	29.27	29.66	36.25	­	35.03	­	-
Clinician shirt after Ch+ koala Before clean	4	32.22	31.48	37.66	­	37.86	­	++
Ultrasound probe dirty	4	35.15	34.56	37.87	33.95	36.05	35.48	+
Stethoscope before clean from Ch+ koala	6	38.51	39.54	38.91	39.12	39	39.18	-
Examination bench Ch+ koala before clean	5	33.54	33.28	38.16	34.27	35.1	34.8	-
Ultrasaound probe after clean	3	38.33	­	38.21	­	35.17	­	-
Oxy mask Ch+ koala After clean	3	34.13	35.04	35.12	34.63	32.31	34.39	-
Clinicians shirt after Ch+ koala before clean	5	33.26	32.97	36.77	37.21	38.13	36.17	-
clinicians hands before wash	6	37.94	­	39.51	­	37.22		-
Clinician's shirt Ch+ koala before wash	4	32.02	32.27	37.48	37.81	36.09		-
Stethoscope before clean from Ch+ koala	5	33.17	33.47	38.4	­	37.61	­	-
Oxy Mask after clean	4	37.72	35.49	39.23	­	38.77	­	-
Ultrasound probe after clean	4	36.15	35.13	38.24		37.71		-
